# Supplementary material for: The Contribution of BaTiO3 to the Stability Improvement of Ethylene–Propylene–Diene Rubber: Part I—Pristine Filler
Source: MDPI journal article supplement (doi:10.3390/polym15092190), 2023-05-05
Supplement: s1 [file s1]

## Supplementary materials

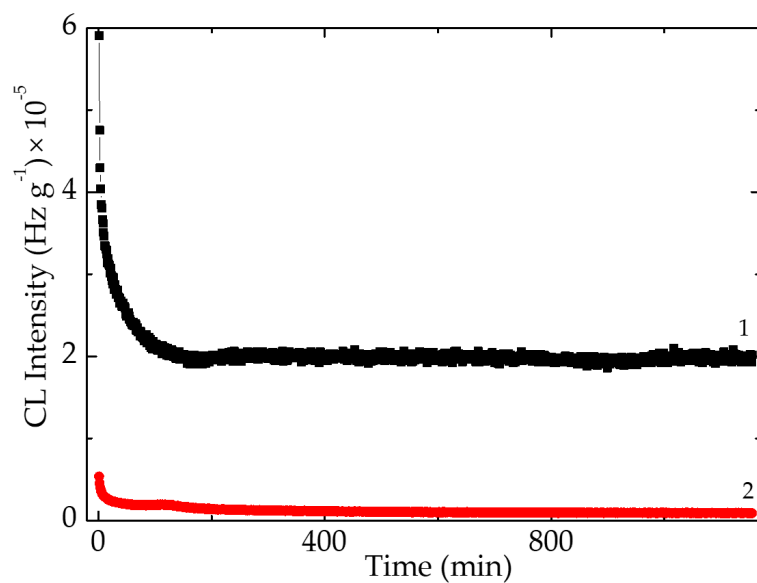

**Figure S1.** The isothermal CXL spectra recorded on pristine EPDM/carbon black samples.

Temperature: (1) 180 °C, (2) 170 °C.

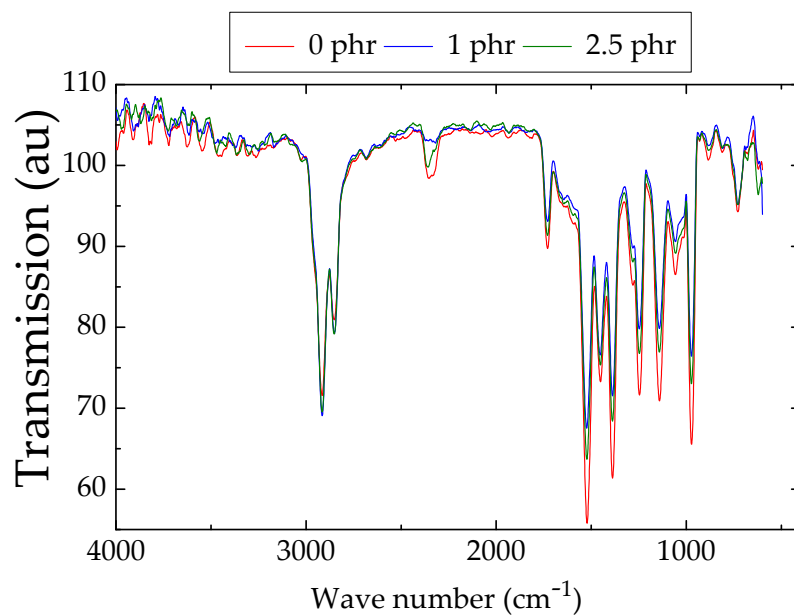

**Figure S2.** The FTIR spectra recorded on EPDM/BaTiO<sub>3</sub> composites exposed to a  $\gamma$ -dose of 100 kGy.
